# Supplementary material for: Recent Perspective of Lactobacillus in Reducing Oxidative Stress to Prevent Disease
Source: MDPI journal article supplement (doi:10.3390/antiox12030769), 2023-03-21
Supplement: s1 [file s1]

Supplementary table 1. Abbreviations.

| Full name                                               | Abbreviations                 |
|---------------------------------------------------------|-------------------------------|
| reactive oxygen species                                 | ROS                           |
| reactive nitrogen species                               | RNS                           |
| nicotinamide adenine dinucleotide phosphate             | NADPH                         |
| NADPH oxidase                                           | NOX                           |
| myeloperoxidase                                         | MPO                           |
| nitric oxide synthase                                   | NOS                           |
| lipoxygenases                                           | LOXs                          |
| cyclooxygenases                                         | COXs                          |
| superoxide dismutase                                    | SOD                           |
| catalase                                                | CAT                           |
| glutathione peroxidase                                  | GPX                           |
| glutathione reductase                                   | GSR                           |
| glutathione S-transferase                               | GST                           |
| melatonin                                               | MEL                           |
| thioredoxin                                             | Trx                           |
| hydrogen peroxide                                       | H <sub>2</sub> O <sub>2</sub> |
| natural killer cells                                    | NK cells                      |
| exopolysaccharides                                      | EPS                           |
| Inflammatory bowel disease                              | IBD                           |
| Crohn's disease                                         | CD                            |
| ulcerative colitis                                      | UC                            |
| lipid peroxidation                                      | LPO                           |
| NAD(P)H: quinone oxidoreductase 1                       | NQO1                          |
| Nuclear factor E2-related factor 2                      | Nrf2                          |
| dextran sulfate sodium                                  | DSS                           |
| Total Antioxidant Status                                | TAS                           |
| lipopolysaccharide                                      | LPS                           |
| Nuclear Factor-Kappa B                                  | NF- $\kappa$ B                |
| Antioxidant Response Elements                           | AREs                          |
| 8-oxo-7-hydrodeoxyguanosine                             | 8-oxodG                       |
| extracellular signal-regulated kinase                   | ERK                           |
| c-Jun N-terminal kinase                                 | JNK                           |
| p38 Mitogen-activated protein kinases                   | MAPK                          |
| phosphatidylinositol-3-kinase                           | PI3K                          |
| phosphatase and tensin homolog deleted on chromosome 10 | PTEN                          |
| protein kinase B                                        | AKT/PKB                       |
| 4E-binding protein 1                                    | 4EBP1                         |
| short-chain fatty acids                                 | SCFAs                         |
| 4-nitroquoline 1-oxide                                  | 4NQO                          |
| 1,2-dimethylhydrazine                                   | DMH                           |
| Alcoholic Liver Disease                                 | ALD                           |

|                                    |         |
|------------------------------------|---------|
| Non-alcoholic fatty liver disease  | NAFLD   |
| alcoholic steatohepatitis          | ASH     |
| bile acid hydrolase                | BAH     |
| fibroblast growth factor 15        | FGF15   |
| Na-dependent bile acid transporter | ASBT    |
| selenium-enriched probiotics       | SP      |
| D-galactose                        | (D-Gal) |
| acute liver injury                 | ALI     |

---

In the order of appearance in the review
